# Supplementary material for: Space-filling and benthic competition on coral reefs
Source: PeerJ journal article supplement (doi:10.7717/peerj.11213), 2021-06-29

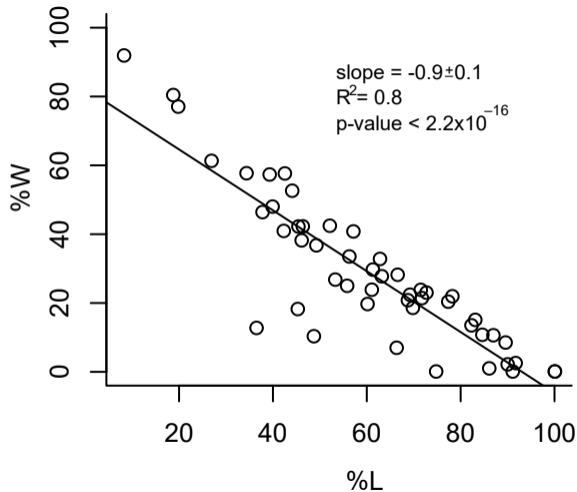

Supplement: Figure_S3.pdf [file Figure_S3.pdf]
