# Supplementary material for: Space-filling and benthic competition on coral reefs
Source: PeerJ. 2021 Jun 29;9:e11213. doi: 10.7717/peerj.11213 (PMC8253116; doi:10.7717/peerj.11213)
Supplement: Supplemental Information 1 — Raw measurements of coral geometric properties along with other variables for individual coral colonies. [file peerj-09-11213-s001.xlsx]

## Sheet: Source_Data_1_coral_colonies_ge
Filename	ID	Species_Name	Type	Species	Depth	Polyp_diameter	Volume	Surface_Area	Volume_SA	SA_polyp2	Perimeter_D	Perimeter_D Lower CI	Perimeter_D Upper CI	Surface_D	Surface_D Lower CI	Surface_D Upper CI	RP_length	perimeter_length_3D	P_polyp_3D	RP_SA	P_SA_3D	L	W	N	Area	Dead_tissue_area	Normalized_dead_tissue_area
CUR11_cropped_calibrated.stl-dataC-new.dat	CUR11	Orbicella faveolata	Mound	1	50	0.2708	4.9887e+07	404231	123.412	5.51229e+06	0.99	0.977345	0.999625	2.01447	1.95254	2.07778	606.94	1259	4649.19	0.00150147	0.00311456	34.2811	57.6113	8.10765	EAST	12331.4	0.0305059
CUR13-1_cropped_calibrated.stl-dataC-new.dat	CUR13	Orbicella faveolata	Mound	1	25	0.2134	3.54351e+07	278894	127.056	6.12422e+06	1.00437	0.996066	1.01257	2.07675	1.96111	2.12759	579.08	597	2797.56	0.00207634	0.00214059	26.8247	61.2079	11.9675	MIDDLE	7617.5	0.0273132
CUR40_calibrated_cropped.stl-dataC-new.dat	CUR40	Siderastrea siderea	Mound	4	15	0.274	145562	15702	9.2703	209148	0.999	0.986548	1.00791	1.96261	1.89722	2.04336	815.47	1329	4850.36	0.0519341	0.0846389	53.1995	26.7036	20.0969	MIDDLE	1557	0.0991593
CUR8_interface_cropped_calibrated_2.stl-dataC-new.dat	CUR8	Orbicella faveolata	Mound	1	25	0.2254	4.6768e+06	63765.7	73.3435	1.2551e+06	0.996	0.991549	1.00089	1.99265	1.91685	2.09307	392.63	477.55	2118.68	0.00615739	0.00748914	66.2696	6.88898	26.8414	EAST	1466.3	0.0229951
CUR36calibrated.stl-dataC-new.dat	CUR36	Orbicella faveolata	Mound	1	15	0.34	735257	45206	16.2646	391055	1.00396	0.99477	1.01429	2.11482	1.98678	2.2505	496.74	578.5	1701.47	0.0109884	0.012797	39.8285	47.9047	12.2668	MIDDLE	1354	0.0299518
CUR37calibrated.stl-dataC-new.dat	CUR37	Siderastrea siderea	Mound	4	15	0.278	266990	15069	17.7179	194982	1.0036	0.999449	1.01002	2.01845	1.94669	2.10366	568.86	871	3133.09	0.0377503	0.0578008	61.2036	29.6035	9.19295	MIDDLE	1318	0.0874643
CUR54calibrated.stl-dataC-new.dat	CUR54	Siderastrea siderea	Mound	4	15	0.256	178445	11961	14.9189	182510	0.992	0.982867	0.997576	1.96088	1.89622	2.0296	718.51	781.5	3052.73	0.0600711	0.0653373	82.216	13.4104	4.37353	MIDDLE	1088	0.0909623
CUR27calibrated.stl-dataC-new.dat	CUR27	Colpophyllia natans	Mound	7	35	0.674	280565	26324	10.6582	57947.2	1.00252	0.99924	1.00725	1.99804	1.94288	2.06405	652.91	1255.5	1862.76	0.0248028	0.0476941	57.0578	40.6914	2.2508	MIDDLE	790	0.0300106
CUR34_calibrated.stl-dataC-new.dat	CUR34	Orbicella faveolata	Mound	1	50	0.29	196389	28700	6.84281	341260	1.00761	1.00282	1.01391	1.94048	1.93024	1.95334	1096.7	1921.5	6625.86	0.0382125	0.0669512	72.6314	22.9205	4.44806	EAST	543	0.0189199
CUR40_2_calibrated.stl-dataC-new.dat	CUR40_2	Montastraea cavernosa	Mound	6	15	0.738	9831.3	5416	1.68143	10735.5	0.988	0.969261	1.00008	1.89519	1.84839	1.94322	701.45	993.5	1346.21	0.119968	0.169916	45.2045	18.1487	36.6468	MIDDLE	355	0.0655465
CUR56calibrated.stl-dataC-new.dat	CUR56	Orbicella faveolata	Mound	1	17	0.322	68420.4	8973	7.62514	86541.8	1.00068	0.99684	1.00375	2.01659	1.94384	2.09018	348.19	545	1692.55	0.0388042	0.0607378	66.48	28.1054	5.41455	MIDDLE	160	0.0178313
CUR41_1_calibrated.stl-dataC-new.dat	CUR41_1	Montastraea cavernosa	Mound	6	25	1.316	19852	3752	5.29104	2166.46	1.00916	0.988272	1.02371	2.00926	1.93723	2.07781	307.09	430.05	326.786	0.081847	0.114619	48.63	10.2453	41.1247	MIDDLE	79	0.0210554
CUR41_2_calibrated.stl-dataC-new.dat	CUR41_2	Montastraea cavernosa	Mound	6	25	1.224	6931.3	2451	2.82795	1635.99	0.996	0.992708	1.00158	2.03709	1.94596	2.14015	233.18	495.15	404.534	0.0951367	0.20202	36.4181	12.661	50.921	MIDDLE	61	0.0248878
CSA031_cropped_calibrated.stl-dataC-new.dat	CSA031	Orbicella faveolata	Mound	1	32	0.2178	119467	5074	23.545	106963	0.996	0.982838	1.00702	2.03379	1.95881	2.10856	89.409	94.05	431.818	0.017621	0.0185357	86.0036	0.904127	13.0922	WEST	42	0.00827749
CUR58_calibrated.stl-dataC-new.dat	CUR58	Pseudodiploria strigosa	Mound	5	15	0.294	5815.8	1438	4.04437	16636.6	1.00713	0.999211	1.01804	2.0584	1.96761	2.18985	139.47	180.05	612.415	0.0969889	0.125209	74.6878	0	25.3122	MIDDLE	37	0.0257302
CUR38_calibrated.stl-dataC-new.dat	CUR38	Siderastrea siderea	Mound	4	15	0.33	11230.6	3896	2.8826	35775.9	0.998	0.995836	1.00134	1.888	1.74556	2.01714	325.03	536.5	1625.76	0.0834266	0.137705	91.0106	0	8.98936	MIDDLE	33	0.00847023
CUR22_calibrated.stl-dataC-new.dat	CUR22	Montastraea cavernosa	Mound	6	30	0.998	5362.7	1605	3.34125	1611.44	0.999	0.994759	1.00888	1.99407	1.8539	2.1322	88.678	126.05	126.303	0.0552511	0.0785358	52.0311	42.3491	5.61978	MIDDLE	27	0.0168224
CUR59_calibrated.stl-dataC-new.dat	CUR59	Pseudodiploria strigosa	Mound	5	15	0.252	12123	3347	3.62205	52705.3	0.996	0.990001	0.999478	1.97597	1.9308	2.02847	207.62	366.1	1452.78	0.0620317	0.109382	55.7223	24.8925	19.3853	MIDDLE	27	0.00806693
CSA017_calibrated_cropped.stl-dataC-new.dat	CSA017	Orbicella faveolata	Mound	1	32	0.1622	301395	17491.3	17.2311	664845	1.00185	0.997113	1.00591	1.94099	1.90126	1.98106	204.85	268.25	1653.82	0.0117115	0.0153362	45.3371	42.1266	12.5363	WEST	0	0
CSA025_cropped_calibrated.stl-dataC-new.dat	CSA025	Diploria labyrinthiformis	Mound	2	32	0.498	548257	13073.8	41.9356	52716.1	1.00011	0.986177	1.01158	2.13021	1.95892	2.31719	62.741	88.8	178.313	0.00479899	0.00679221	19.73	76.9566	3.31334	WEST	0	0
CSA035_SA.stl	CSA035	Agaricia agaricites	Plate	8	32	0.452	748.22	824.7	0.907263	4036.63	0.989165	0.975432	0.998309	2.08208	2.00539	2.15632	38.39	NA	NA	0.0465503	NA	89.4832	8.41754	2.0993	WEST	0	0
CSA142_per_cropped.stl-dataC-new.dat	CSA142	Acropora palmata	Tree	3	13	0.1342	367170	305266	1.20279	1.69502e+07	0.988	0.980092	0.995066	2.05913	1.96192	2.17241	304.53	553	4120.72	0.000997588	0.00181153	39.2095	57.2361	3.55437	EAST	0	0
CSA147_2_cropped.stl-dataC-new.dat	CSA147_2	Orbicella faveolata	Mound	1	32	0.3966	874768	20736.3	42.1853	131834	0.977	0.950243	0.998819	2.0303	1.97281	2.10332	117.92	187.156	471.901	0.00568665	0.00902552	71.65	21.3273	7.02275	EAST	0	0
CSA150_cropped_calibrated.stl-dataC-new.dat	CSA150	Orbicella faveolata	Mound	1	32	0.2778	605146	18553	32.6172	240408	0.996	0.99237	0.999245	2.06473	1.96297	2.17212	95.048	150.5	541.757	0.00512305	0.0081119	46.2674	42.1665	11.5661	EAST	0	0
CSA195_cropped.stl-dataC-new.dat	CSA195	Siderastrea siderea	Mound	4	32	0.2426	773056	19903.1	38.841	338173	1.00085	0.996323	1.00674	2.00371	1.93704	2.08531	167.31	269.95	1112.74	0.00840623	0.0135632	100	0	0	MIDDLE	0	0
CUR1_2_calibrated.stl-dataC-new.dat	CUR1_2	Pseudodiploria strigosa	Mound	5	30	0.542	4815.9	1569	3.06941	5341.02	1.00909	0.985607	1.027	1.99543	1.93121	2.06093	67.531	182.5	336.716	0.0430408	0.116316	84.5374	10.6681	4.79442	MIDDLE	0	0
CUR1_calibrated.stl-dataC-new.dat	CUR1	Pseudodiploria strigosa	Mound	5	30	0.377	70749.4	4654.6	15.1999	32749.1	1	0.994292	1.00511	1.99326	1.92943	2.05815	62.91	95.6	253.581	0.0135157	0.0205388	91.6342	2.44494	5.92085	MIDDLE	0	0
CUR10_2_cropped_calibrated.stl-dataC-new.dat	CUR10	Orbicella faveolata	Mound	1	25	0.27	3660.2	1205	3.03751	16529.5	1.00141	0.993368	1.00999	2.08311	1.94324	2.28099	78.875	95.5	353.704	0.0654564	0.0792531	49.1639	36.6519	14.1842	EAST	0	0
CUR20_1calibrated.stl-dataC-new.dat	CUR20_1	Diploria labyrinthiformis	Mound	2	30	0.378	915.1	393	2.3285	2750.48	1.00595	1.00217	1.01251	2.05055	1.95126	2.16144	41.416	161.8	428.042	0.105384	0.411705	83.0278	15.0088	1.96334	MIDDLE	0	0
CUR23calibrated.stl-dataC-new.dat	CUR23	Colpophyllia natans	Mound	7	60	0.69	204874	19198	10.6717	40323.5	0.994	0.984486	1.00604	2.01079	1.96858	2.04986	399.8	755.5	1094.93	0.0208251	0.0393531	18.6762	80.3292	0.99461	MIDDLE	0	0
CUR24_1calibrated.stl-dataC-new.dat	CUR24_1	Colpophyllia natans	Mound	7	30	0.762	23228.7	5200	4.46706	8955.57	1.00831	0.992588	1.02324	1.97026	1.91056	2.03502	383.33	448.75	588.911	0.0737173	0.0862981	78.1472	21.8528	0	MIDDLE	0	0
CUR24_2calibrated.stl-dataC-new.dat	CUR24_2	Pseudodiploria strigosa	Mound	5	35	0.366	2808.2	1072	2.61959	8002.63	0.999	0.991055	1.01049	1.98036	1.8914	2.07772	81.252	138.7	378.962	0.0757948	0.129384	69.1188	22.3042	8.57706	MIDDLE	0	0
CUR25calibrated.stl-dataC-new.dat	CUR25	Siderastrea siderea	Mound	4	30	0.332	1996.5	648	3.08102	5878.94	0.998	0.989955	1.00938	1.98318	1.93252	2.04456	90.733	143.2	431.325	0.14002	0.220988	89.9246	2.07518	8.00023	MIDDLE	0	0
CUR28calibrated.stl-dataC-new.dat	CUR28	Colpophyllia natans	Mound	7	30	0.612	42504	11745	3.6189	31358.1	1.006	0.995009	1.01617	1.98587	1.94	2.04503	444.48	1351	2207.52	0.0378442	0.115028	68.6634	20.7085	10.6281	MIDDLE	0	0
CUR29_calibrated.stl-dataC-new.dat	CUR29	Acropora palmata	Tree	3	15	0.138	158.5	272	0.582721	14282.7	1.00397	0.990479	1.01524	2.08504	1.97882	2.19444	37.958	51.9	376.087	0.139551	0.190809	8.18312	91.8169	0	MIDDLE	0	0
CUR3_edited.stl-dataC-new.dat	CUR3	Montastraea cavernosa	Mound	6	25	1.0606	80385.1	5248.9	15.3147	4666.22	0.999	0.995567	1.00269	1.96767	1.86202	2.08361	150.93	107.8	101.641	0.0287546	0.0205376	77.2695	20.2911	2.43942	MIDDLE	0	0
CUR32calibrated.stl-dataC-new.dat	CUR32	Agaricia agaricites	Plate	8	30	0.31	312.8	561	0.557576	5837.67	1.00867	0.994346	1.02685	2.05129	1.95955	2.14499	33.584	73.85	238.226	0.0598645	0.13164	42.4566	57.5434	0	EAST	0	0
CUR39_calibrated.stl-dataC-new.dat	CUR39	Siderastrea siderea	Mound	4	15	0.318	1883.4	852	2.21056	8425.3	0.986	0.976133	0.992166	1.84322	1.67488	2.01264	100.09	163.25	513.365	0.117477	0.191608	86.886	10.5306	2.58341	MIDDLE	0	0
CUR4_interface2_edited.stl-dataC-new.dat	CUR4	Diploria labyrinthiformis	Mound	2	32	0.238	496532	14028.1	35.3956	247654	0.99	0.983764	0.993323	2.00742	1.92108	2.09051	166.55	204.65	859.874	0.0118726	0.0145886	46.0244	38.0977	15.8779	MIDDLE	0	0
CUR40_3_calibrated.stl-dataC-new.dat	CUR40_3	Pseudodiploria strigosa	Mound	5	15	0.352	234.3	531	0.441243	4285.58	0.971	0.952793	0.982709	1.86489	1.73578	1.99195	114	124.45	353.551	0.214689	0.234369	69.7288	18.4924	11.7788	MIDDLE	0	0
CUR46calibrated.stl-dataC-new.dat	CUR46	Pseudodiploria strigosa	Mound	5	20	0.668	28369.8	5328	5.32466	11940.2	0.999	0.991639	1.00897	1.99275	1.96474	2.01972	207.42	411.25	615.644	0.0389302	0.0771866	62.7221	32.7067	4.57116	MIDDLE	0	0
CUR52calibrated.stl-dataC-new.dat	CUR52	Montastraea cavernosa	Mound	6	28	0.804	29131.1	4405	6.61319	6814.5	0.987	0.982513	0.994494	2.01242	1.9575	2.07098	239.3	277.55	345.211	0.0543246	0.0630079	60.0675	19.6002	20.3322	MIDDLE	0	0
CUR53_calibrated.stl-dataC-new.dat	CUR53	Montastraea cavernosa	Mound	6	28	0.84	50716.4	8919	5.68633	12640.3	0.995	0.974587	1.01482	1.98308	1.92831	2.04137	448.6	707	841.667	0.0502971	0.079269	56.1968	33.4102	10.393	MIDDLE	0	0
CUR6_edited.stl-dataC-new.dat	CUR6	Montastraea cavernosa	Mound	6	35	0.9244	23550.2	3480	6.7673	4072.48	0.987	0.964436	1.01224	1.93462	1.87414	1.99709	54.012	98.3	106.339	0.0155207	0.0282471	99.9685	0.015779	0.0157262	MIDDLE	0	0
CUR60calibrated.stl-dataC-new.dat	CUR60	Montastraea cavernosa	Mound	6	20	0.792	10533.4	2195	4.79882	3499.32	1.00187	0.987823	1.01456	2.08932	1.99146	2.20468	126.96	217.6	274.747	0.0578405	0.0991344	63.1036	27.6658	9.23061	MIDDLE	0	0
CUR61calibrated.stl-dataC-new.dat	CUR61	Diploria labyrinthiformis	Mound	2	20	0.354	2373.5	806	2.94479	6431.74	0.987	0.973591	1.00367	2.09609	1.99347	2.22395	63.447	93.2	263.277	0.0787184	0.115633	60.9796	23.7596	15.2608	MIDDLE	0	0
CUR69calibrated.stl-dataC-new.dat	CUR69	Colpophyllia natans	Mound	7	63	0.83	127422	13422	9.49356	19483.2	0.991	0.979463	0.999788	2.02255	1.97268	2.08515	737.63	669	806.024	0.0549568	0.0498435	44.0109	52.5265	3.46257	MIDDLE	0	0
CUR70calibrated.stl-dataC-new.dat	CUR70	Montastraea cavernosa	Mound	6	57	1.07	2356.1	7118	0.331006	6217.14	1.00036	0.990701	1.00988	1.98536	1.92303	2.05526	323.97	490.2	458.131	0.0455142	0.0688677	37.6912	46.3139	15.9948	MIDDLE	0	0
CUR71calibrated.stl-dataC-new.dat	CUR71	Pseudodiploria strigosa	Mound	5	12	0.274	145791	11880	12.272	158240	0.998	0.989796	1.00575	2.03723	1.9621	2.11904	340.95	437.45	1596.53	0.0286995	0.0368224	42.2209	40.8451	16.934	MIDDLE	0	0
CUR9_cropped_calibrated.stl-dataC-new.dat	CUR9	Orbicella faveolata	Mound	1	40	0.2792	418881	34739.3	12.0578	445646	1.00455	0.994452	1.0124	1.85914	1.83729	1.88054	366.34	732	2621.78	0.0105454	0.0210712	71.4068	23.7214	4.87183	EAST	0	0
